# Supplementary material for: Physicians' acceptance of drug-drug interaction alerts from clinical decision support systems: A systematic review and meta-analysis
Source: Research Square preprint supplement (doi:10.21203/rs.3.rs-2977577/v1), 2023-05-30
Supplement: Supplementary file 1 [file 70f87b8750ee5cb0185b7309.docx]

Table S2. Search strategy (CDSS) (n=1873).

| Search | PubMed | EMBASE | Web of Science | Scopus | LILACS |
| --- | --- | --- | --- | --- | --- |
| Block #1  I | "Decision Support Systems, Clinical"[Mesh])) OR "Decision Support Systems" OR ("Information Systems"[Mesh])) OR ("Clinical Pharmacy Information Systems"[Mesh] | 'decision support system'/exp OR 'decision support system' OR 'clinical decision support system'/exp OR 'clinical decision support system' OR 'information system'/exp OR 'information system' OR 'medical information system'/exp OR 'medical information system' | TS=("Decision Support Systems, Clinical" OR "Decision Support Systems" OR "Information Systems" OR "Clinical Pharmacy Information Systems")) | "Decision Support Systems, Clinical" OR "Decision Support Systems" OR "Information Systems" OR "Clinical Pharmacy Information Systems") | Sistemas de Apoio a Decisões Clínicas  OR  Sistemas de Apoio a Decisões OR Sistemas de Informação  OR Sistemas de Informação em Farmácia Clínica |
| Block #2  O | "Drug Interactions"[Mesh]) OR "Drug interactions" | 'drug interaction' | TS=(Drug Interactions) | (Drug Interactions) | Medicamentos |
| Block #3  NOT | "Herb-Drug Interactions"[Mesh] OR "Food-Drug Interactions"[Mesh] | 'herb drug interaction' OR 'food drug interaction' | - | - |  |
| Combo | #1 AND #2 AND NOT #3 (filters)= 772 | #1 AND #2 AND NOT #3 (filters)= 261 | #1 AND #2 (filters)= 166 | #1 AND #2 (filters)= 538 | #1 AND #2 (filters years)= 35 |

Google Scholar: ("Decision Support Systems, Clinical" OR "Decision Support Systems" OR "Information Systems" OR "Clinical Pharmacy Information Systems" AND "Drug interactions") filetype:PDF (100 first).
