# Supplementary material for: Physicians' acceptance of drug-drug interaction alerts from clinical decision support systems: A systematic review and meta-analysis
Source: Research Square preprint supplement (doi:10.21203/rs.3.rs-2977577/v1), 2023-05-30
Supplement: Supplementary file 2 [file 93f0a0a2d3a3b7924dd86bb1.xlsx]

## Sheet: Página1
S6. Quality assessment of prevalence studies (JBI's tool).
Question/Author (year)	Ahn et al. (2014a)	Ahn et al. (2014b)	Alsaidan et al. (2022)	Amkreutz et al. (2017)	Bhakta et al. (2019)	Bryant, Fletcher and Payne (2014)	Edrees et al. (2020)	Fritz et al. (2012)	Knight et al. (2019)	Muylle et al. (2021)	Nasuhara et al. 2015	Polidori, Di Giorgio and Provenzani (2012)	Straichman et al. (2017)	Tukukino et . (2022)	Velez-Diaz-Pallares et al. (2013)	Zenziper et al. (2014)
1.Was the sample frame appropriate to address the target population?	Y	Y	Y	Y	Y	Y	Y	N	Y	Y	Y	Y	Y	Y	Y	Y
2. Were study participants sampled in an appropriate way?	Y	Y	Y	Y	U	Y	Y	N	Y	Y	Y	Y	Y	Y	Y	Y
3. Was the sample size adequate?	Y	Y	Y	Y	U	Y	Y	N	Y	Y	Y	Y	Y	N	N	NA
4. Were the study subjects and the setting described in detail?	Y	Y	Y	Y	Y	Y	Y	N	Y	Y	Y	Y	Y	Y	Y	Y
5. Was the data analysis conducted with sufficient coverage of the identified sample?	Y	Y	Y	Y	U	Y	Y	N	Y	Y	N	Y	Y	Y	Y	Y
6. Were valid methods used for the identification of the condition?	Y	Y	Y	Y	Y	Y	Y	Y	Y	Y	Y	Y	Y	Y	Y	Y
7. Was the condition measured in a standard, reliable way for all participants?	Y	Y	Y	Y	U	Y	Y	Y	Y	Y	Y	Y	Y	Y	Y	Y
8. Was there appropriate statistical analysis?	Y	Y	Y	N	Y	Y	Y	Y	Y	Y	N	Y	Y	U	U	N
9. Was the response rate adequate, and if not, was the low response rate managed appropriately?	Y	Y	Y	Y	Y	Y	Y	N	Y	Y	Y	Y	Y	Y	Y	Y
Overall appraisal:
Yes percentage	100	100	100	88.8889	55.5556	100	100	33.3333	100	100	77.7778	100	100	78	77.7778	87.5
Quality assessment:	HIGH	HIGH	HIGH	HIGH	MODERATE	HIGH	HIGH	LOW	HIGH	HIGH	HIGH	HIGH	HIGH	HIGH	HIGH	HIGH
Low<50%
moderate =50<75%
High =75 -100%
