# Supplementary material for: Physicians' acceptance of drug-drug interaction alerts from clinical decision support systems: A systematic review and meta-analysis
Source: Research Square preprint supplement (doi:10.21203/rs.3.rs-2977577/v1), 2023-05-30
Supplement: Supplementary file 2 [file c0d39c0bc1e7ef3316f42508.docx]

**Additional file 2**

Appendix 2 Excluded articles and reasons for exclusion.

**References (n=53)**

**1. Problem (14)**

1. Ababneh, M. A., Al-Azzam, S. I., Alzoubi, K. H., & Rababa'h, A. M. (2020). Medication errors in outpatient pharmacies: comparison of an electronic and a paper-based prescription system. Journal of Pharmaceutical Health Services Research, 11(3), 245-248.
2. Aminah Mazyin Mohamed Ariff, Sivalingam Nalliah, Hafidz Abd Hadi et al. Causation of potential drug to drug interactions alerts, alert overrides, and adverse drug events, 09 April 2021, PREPRINT (Version 1) available at Research Square [https://doi.org/10.21203/rs.3.rs-363764/v1]
3. Armstrong, E. P., Wang, S. M., Hines, L. E., Patel, B. V., Leslie, R. S., & Malone, D. C. (2014). Prescriber perceptions of a near real-time fax alert program for potential drug-drug interactions. *Journal of Managed Care Pharmacy*, *20*(5), 494-500.
4. Armahizer, M. J., Kane-Gill, S. L., Smithburger, P. L., Anthes, A. M., & Seybert, A. L. (2012). Comparing drug-drug interaction severity for clinician opinion to proprietary databases. *Adv Pharmacoepidemiol Drug Saf*, *1*, 115.
5. Bakker, T., Abu-Hanna, A., Dongelmans, D. A., Vermeijden, W. J., Bosman, R. J., de Lange, D. W., ... & SIMPLIFY Study Group. (2021). Clinically relevant potential drug-drug interactions in intensive care patients: A large retrospective observational multicenter study. *Journal of Critical Care*, *62*, 124-130.
6. Bakker, T., Klopotowska, J. E., de Keizer, N. F., van Marum, R., van der Sijs, H., de Lange, D. W., ... & Wesselink, E. (2020). Improving medication safety in the Intensive Care by identifying relevant drug-drug interactions-Results of a multicenter Delphi study. *Journal of critical care*, *57*, 134-140.
7. Bouzillé G, Morival C, Westerlynck R, et al. An Automated Detection System of Drug-Drug Interactions from Electronic Patient Records Using Big Data Analytics. Stud Health Technol Inform. 2019;264:45-49. doi:10.3233/SHTI190180
8. Buckley, M., Kazem, N., Wicks, L., Smithburger, P., & Kane-Gill, S. (2013). 586: Clinical Decision Support Drug-Drug Interaction Alert Overrides: A Comparison Between Intensive Care. *Critical care medicine*, *41*(12), A143-A144.
9. Caraballo, P. J., Parkulo, M., Blair, D., Elliott, M., Schultz, C., Sutton, J., ... & Kullo, I. (2015). Clinical Decision Support to Implement CYP2D6 Drug-Gene Interaction. *Studies in Health Technology and Informatics*, *216*, 946-946.
10. Haueis P, Greil W, Huber M, Grohmann R, Kullak-Ublick GA, Russmann S. Evaluation of drug interactions in a large sample of psychiatric inpatients: a data interface for mass analysis with clinical decision support software. Clin Pharmacol Ther. 2011;90(4):588-596. doi:10.1038/clpt.2011.150
11. Horn J, Ueng S. The Effect of Patient-Specific Drug-Drug Interaction Alerting on the Frequency of Alerts: A Pilot Study. Ann Pharmacother. 2019;53(11):1087-1092. doi:10.1177/1060028019863419
12. Lebowitz, M. B., Olson, K. L., Burns, M., Harper, M. B., & Bourgeois, F. (2016). Drug-drug interactions among hospitalized children receiving chronic antiepileptic drug therapy. *Hospital pediatrics*, *6*(5), 282-289.
13. Pfistermeister B, Sedlmayr B, Patapovas A, et al. Development of a Standardized Rating Tool for Drug Alerts to Reduce Information Overload. Methods Inf Med. 2016;55(6):507-515. doi:10.3414/ME16-01-0003
14. Strom, B. L., Schinnar, R., Bilker, W., Hennessy, S., Leonard, C. E., & Pifer, E. (2010). Randomized clinical trial of a customized electronic alert requiring an affirmative response compared to a control group receiving a commercial passive CPOE alert: NSAID—warfarin co-prescribing as a test case. *Journal of the American Medical Informatics Association*, *17*(4), 411-415.

**2. Intervention (4)**

1. Bubp JL, Park MA, Kapusnik-Uner J, et al. Successful deployment of drug-disease interaction clinical decision support across multiple Kaiser Permanente regions. J Am Med Inform Assoc. 2019;26(10):905-910. doi:10.1093/jamia/ocz020
2. Frölich, T., Zorina, O., Fontana, A. O., Kullak-Ublick, G. A., Vollenweider, A., & Russmann, S. (2011). Evaluation of medication safety in the discharge medication of 509 surgical inpatients using electronic prescription support software and an extended operational interaction classification. *European journal of clinical pharmacology*, *67*(12), 1273-1282.
3. Kenawy, A. S., & Kett, V. (2019). The impact of electronic prescription on reducing medication errors in an Egyptian outpatient clinic. *International journal of medical informatics*, *127*, 80-87.
4. Lee J, Han H, Ock M, Lee SI, Lee S, Jo MW. Impact of a clinical decision support system for high-alert medications on the prevention of prescription errors. Int J Med Inform. 2014;83(12):929-940. doi:10.1016/j.ijmedinf.2014.08.006
5. Mazzaglia G, Piccinni C, Filippi A, et al. Effects of a computerized decision support system in improving pharmacological management in high-risk cardiovascular patients: A cluster-randomized open-label controlled trial. Health Informatics J. 2016;22(2):232-247. doi:10.1177/1460458214546773

**3. Outcome (15)**

1. Abbass, I., Mhatre, S., Sansgiry, S. S., Tipton, J., & Frost, C. (2011). Impact and determinants of commercial computerized prescriber order entry on the medication administration process. *Hospital Pharmacy*, *46*(5), 341-348.
2. Abramson, E. L., Barrón, Y., Quaresimo, J., & Kaushal, R. (2011). Electronic prescribing within an electronic health record reduces ambulatory prescribing errors. *The Joint Commission Journal on Quality and Patient Safety*, *37*(10), 470-478.
3. Akçura, M. T., & Ozdemir, Z. D. (2014). Drug prescription behavior and decision support systems. *Decision Support Systems*, *57*, 395-405.
4. Alagiakrishnan, K., Wilson, P., Sadowski, C. A., Rolfson, D., Ballermann, M., Ausford, A., ... & Hayward, R. S. (2016). Physicians’ use of computerized clinical decision supports to improve medication management in the elderly–the Seniors Medication Alert and Review Technology intervention. *Clinical interventions in aging*, *11*, 73.
5. Amkreutz, J., Koch, A., Buendgens, L., Trautwein, C., & Eisert, A. (2017). Clinical decision support systems differ in their ability to identify clinically relevant drug interactions of immunosuppressants in kidney transplant patients. *Journal of Clinical Pharmacy and Therapeutics*, *42*(3), 276-285.
6. Catalán, A., Borrell, F., Pons, A., Amado, E., Baena, J. M., & Morales, V. (2014). Patient safety in primary care: PREFASEG project. *Medicina Clinica*, *143*, 32-35.
7. Kuo, Y. C., & Cheng, S. H. (2017). Adoption of medication alert systems in hospital outpatient departments in Taiwan. *International Journal of Medical Informatics*, *102*, 111-117.
8. Miller, M. J., Burns, C. F., Kapusnik-Uner, J., Carreno, R., & Matuszewski, K. A. (2017). Depression screening for prescribed medications with mental health risk: Considerations for clinical decision support, workflow redesign, and health information exchange arrangements. *Research in Social and Administrative Pharmacy*, *13*(3), 485-493.
9. Quintens, C., De Rijdt, T., Van Nieuwenhuyse, T., Simoens, S., Peetermans, W. E., Van den Bosch, B., ... & Spriet, I. (2019). Development and implementation of “Check of Medication Appropriateness”(CMA): advanced pharmacotherapy-related clinical rules to support medication surveillance. *BMC medical informatics and decision making*, *19*(1), 1-10.
10. Rommers, M. K., Teepe-Twiss, I. M., & Guchelaar, H. J. (2011). A computerized adverse drug event alerting system using clinical rules. *Drug safety*, *34*(3), 233-242.
11. Schwartz, E. J., Turgeon, J., Patel, J., Patel, P., Shah, H., Issa, A. M., ... & Bain, K. T. (2017). Implementation of a standardized medication therapy management plus approach within primary care. *The Journal of the American Board of Family Medicine*, *30*(6), 701-714.
12. Slight SP, Seger DL, Nanji KC, et al. Are we heeding the warning signs? Examining providers' overrides of computerized drug-drug interaction alerts in primary care. PLoS One. 2013;8(12):e85071. Published 2013 Dec 26. doi:10.1371/journal.pone.0085071
13. Chin PKL, Chuah Q, Crawford AM, et al. Clinical decision support in a hospital electronic prescribing system informed by local data: experience at a tertiary New Zealand centre. Intern Med J. 2020;50(10):1225-1231. doi:10.1111/imj.14706
14. Pirnejad H, Amiri P, Niazkhani Z, et al. Preventing potential drug-drug interactions through alerting decision support systems: A clinical context based methodology. Int J Med Inform. 2019;127:18-26. doi:10.1016/j.ijmedinf.2019.04.006
15. Pontefract SK, Hodson J, Slee A, et al. Impact of a commercial order entry system on prescribing errors amenable to computerised decision support in the hospital setting: a prospective pre-post study. BMJ Qual Saf. 2018;27(9):725-736. doi:10.1136/bmjqs-2017-007135

**4. Study design (19)**

1. Ahumada, L. M., Desai, B., Simpao, A. F., Rehman, M. A., & Shelov, E. D. (2013, October). Medication alert fatigue: the design and use of a medication alert dashboard as part of a comprehensive approach to drug-drug interaction alerts. *Anesthesia and Analgesia* (Vol. 117, pp. 62-63). 530 WALNUT ST, PHILADELPHIA, PA 19106-3621 USA: LIPPINCOTT WILLIAMS & WILKINS.
2. Baysari, M. T., Zheng, W. Y., Li, L., Westbrook, J., Day, R. O., Hilmer, S., ... & Samson, R. (2019). Optimising computerised decision support to transform medication safety and reduce prescriber burden: Study protocol for a mixed-methods evaluation of drug–drug interaction alerts. *BMJ open*, *9*(8), e026034.
3. Caro-Rojas, R. A., Gallardo, H. M., Franco, C. A., & Vanegas, B. S. (2015, October). Implementing Best Practices for the Safe use of Medications: It is Possible to Reduce Adverse Events, a 7-Year Experience. In *DRUG SAFETY* (Vol. 38, No. 10, pp. 974-974). 5 THE WAREHOUSE WAY, NORTHCOTE 0627, AUCKLAND, NEW ZEALAND: ADIS INT LTD.
4. Dieu, L. W., Leuppi-Taegtmeyer, A. B., van den Anker, J., Trachsel, D., & Gotta, V. (2019). Prevalence of high-risk drug-drug interactions in paediatric inpatients: A retrospective, single-centre cohort analysis. *Swiss Medical Weekly*, *149*(3334).
5. Doogue, M., Crawford, A., Miller, H., Drennan, P., Chuah, Q., Strowther, M., & Chin, P. (2017). Evidenced Based Drug-Drug Interaction Alerts in an E-Prescribing System. *Clinical Therapeutics*, *39*(8), e18.
6. Edrees, H.; Amato, M.; Wong, A.; Seger, D.; Bates, D. (2018). Overriding high priority drug-drug interaction alerts in a newly implemented commercial computerized provider order entry system: Override appropriateness and adverse drug events. J*ACCP Journal of the American College of Clinical Pharmacy* - Volume 1, Issue 2, pp. 122-123.
7. Faafp, Mshmi; Sneha, Sweta; Soundararajan, Vijayaraghavan. (2018). Leveraging Blockchain to Improve Clinical Decision Support Systems. *Forum/Posters/CIAO! DC@ EEWC 2019*.
8. Knight, A.; Falade, O.; Maygers, J.; Sevransky, J. (2012). Oral abstracts research factors associated with medication warning acceptance. Society of Hospital Medicine: 2012 Abstracts.
9. Pérez, G. M., Alberola, A. M., Brocal, A. E., Hernández, D. B., González, T. C., & Hernández, D. B. (2012). Prescribing errors detected after an electronic prescribing system implementation. *European Journal of Hospital Pharmacy: Science and Practice*, *19*(2), 94-94.
10. Muylle, K., Gentens, K., Dupont, A., & Cornu, P. (2020, September). Effect Of Several Optimization Strategies In A Clinical Decision Support System For Drug-drug Interactions On Alert Burden And Alert Acceptance. In *ISPE 36th International Conference on Pharmacoepidemiology & Therapeutic Risk Management (ICPE)*.
11. Nanji, K. C., Slight, S. P., Seger, D. L., Cho, I., Fiskio, J. M., Redden, L. M., ... & Bates, D. W. (2014). Overrides of medication-related clinical decision support alerts in outpatients. *Journal of the American Medical Informatics Association*, *21*(3), 487-491.
12. Oreagba, I. A., Eyaru, S., Awodele, O., & Olayemi, S. (2016). DESIGN AND DEVELOPMENT OF AN INTELLIGENT DRUG ALERT SYSTEM FOR ENFORCING MEDICATION SAFETY. *Value in Health*, *19*(3), A279.
13. Patel, A., Philips, N., Philips, A., & Varghese, M. (2015, November). Implementation of a computerized prescriber order entry system in a community hospital from a pharmacy perspective. In *PHARMACOTHERAPY* (Vol. 35, No. 11, pp. E279-E280). 111 RIVER ST, HOBOKEN 07030-5774, NJ USA: WILEY-BLACKWELL.
14. Robertson, A., Slight, S. P., Seger, D. L., Thomas, S., Coleman, J., Bates, D. W., & Phansalkar, S. (2014). An international evaluation of drug-drug interaction alerts that should be non-interruptive in UK and US settings. In *37th Annual Meeting of the Society of General Internal Medicine*. Newcastle University.
15. Smithburger, P. L., Buckley, M. S., Bejian, S., Burenheide, K., & Kane-Gill, S. L. (2011). A critical evaluation of clinical decision support for the detection of drug–drug interactions. *Expert opinion on drug safety*, *10*(6), 871-882.
16. Smithburger, P. L.; Kane-Gill, S. L.; Benedict, N. J.; Falcione, B. A.; Seybert, A. L. (2010). Comparing clinician opinion and proprietary database severity ratings for drug-drug interactions. *Pharmacotherapy* (30), 418e-419.
17. Soh, A.; Ow, R.; Lim, G. K.; Lee, A.; Xie, P.; Lim, B. P. (2013). Clinical decision support for high-priority drug-drug interactions: Evaluation of a commercial medication knowledge base. *Annals of the Academy of Medicine Singapore - Volume 42*, Issue 9, pp. S54.
18. Turgeon, J., & Michaud, V. (2016). Clinical decision support systems: great promises for better management of patients’ drug therapy. *Expert opinion on drug metabolism & toxicology*, *12*(9), 993-995.
19. Vandael, E., Willems, R., Vandenberghe, J., & Foulon, V. (2013). Development of decision support systems to manage QT-prolongation in clinical practice: study protocol. *International Journal of Clinical Pharmacy*, *35*(3), 490-490.

**5. Other: foreign language, unavailable (3)**

1. Becker, M. L.; Baypinar, F.; Pereboom, M.; Lilih, S.; Kingma, H. J.; Van Der Hoeven, R. T. M. (2019). The positive effect of clinical decision support shown at the time of prescribing. *Pharmaceutisch Weekblad* (155), 23-28.
2. Ongering, M. S.; Bakker, T.; Dongelmans, D. A.; De Keizer, N. F.; Abu-Hanna, A.; Klopotowska, J. E. (2019). Effect of a clinical decision support system on reducing drug-drug interactions in the intensive care unit. *Pharmaceutisch Weekblad* (154), 17-22.
3. Sostaric, S., Cornu, P., Dupont, A., Steurbaut, S., & Mrhar, A. (2014). Analysis of the automated drug-drug interaction system. *Farm Vestn*, (65), 294-302.

**Duplicate (1)**

1. Daniel Kurnik, M. D.; Noa Markovits, M. D.; Hillel Halkin, M. D.; Ronen Loebstein, M. D. implementation of a Clinical decision support system for Computerized drug Prescription entries in a large tertiary Care hospital.
