# Supplementary material for: Physicians' acceptance of drug-drug interaction alerts from clinical decision support systems: A systematic review and meta-analysis
Source: Research Square preprint supplement (doi:10.21203/rs.3.rs-2977577/v1), 2023-05-30
Supplement: Supplementary file 3 [file d099f8918bae6fc9f4ee1538.docx]

Table S1. Inclusion and exclusion criteria.

| **PICOs** | **Inclusion criteria** | **Exclusion criteria** |
| --- | --- | --- |
| Population | Physician's prescription with potential drug-drug interactions (DDI) made on Electronic Health Record (EHR) at a hospital and/or primary health care unit). | **1- Population**  -Does not evaluate physician's prescription, as prescription made by pharmacists or nurses;  - Physician's prescriptions are not made on EHR, and not at a hospital and/or primary health systems. |
| **I**ntervention | The Use of a clinical decision support system (CDSS) that is able to detect and inform DDIs. | **2- Intervention**  -CDSS tool unable to detect and inform potential DDI's; |
| **C**omparison | None. | None. |
| **O**utcome measure(s) | Primary outcomes:  -Prevalence of DDIs alerts in each setting;  -Prevalence of alert override by physicians;  Secondary outcomes:  -Drug-drug interaction algorithms (e.g. flow charts) for clinical decision | **3-Outcome**  -Not measured or reported the prevalence of the drug-drug interaction on physician prescriptions;  - Not described the intervention adopted by the physician after DDI identification. |
| Types of **S**tudies included | Retrospective (comparative, cross-sectional, case-control and cohort) and prospective (comparative, cohort) studies reporting the implementation of a CDSS tool used to identify DDIs at hospital and/or primary health care units will be included. | **4- Publication type**  -Reviews, Meta-analysis, editorial, thesis and/or dissertations, letter, correspondence, opinion articles, congress/events, guidelines, study protocol.  **5- Other**  -Foreign language, unavailable document. |
| Question | How is the physician's experience in the use of electronic medical records with a clinical decision support system capable of identifying drug interactions in their prescriptions? | |
