# Supplementary material for: Physicians' acceptance of drug-drug interaction alerts from clinical decision support systems: A systematic review and meta-analysis
Source: Research Square preprint supplement (doi:10.21203/rs.3.rs-2977577/v1), 2023-05-30
Supplement: Supplementary file 5 [file f5edece95668dbfa0ef29c11.xlsx]

## Sheet: Dados
	Study design									CHARACTERISTICS OF THE SYSTEM				Population	Outcomes						Limitations
Identification	Authors	Country	Aim of study	Study design	Follow-up (day, week, month or year)	Setting/Context	Conflict of interest - The authors declare any conflict of interests or not. -Not reported (NR)	Finantial Support	Statistical Analysis (Yes or No)	Intervention CDSS type (process)	CDSS (Governamental or Private)	Drug information database	Characteristic of CDSS (isolate APP or integral part of EHR)	(number /or other measurement of prescriptions)	Outcomes evaluated	Measurement of outcomes (Methods used for it, number of events, %, Median, Mean?)	Alert (Number)	Alert Override (number)	Drug-Drug algorithms (flow charts): Yes or No	Conclusion
ID1	Ahn et al., (2014) a	Korea	To reveal differences in drug-drug interaction (DDI) alerts and the reasons for alert overrides between admitting departments.	Retrospective observational study	46 months	Tertiary teaching hospital	Not	This study was supported by a grant of the Korea Health technology R&D Project, Ministry of Health & Welfare, Republic of Korea (No. HI13C0723) and by a National Research Foundation of Korea (NRF) grant funded by the Korean government (No. 2010-0028631).	Yes	Prescriptions were compared using the official governmental DDI rules. If there is a DDI between drugs, then the DDI alert system generates an alert for the DDI and provides associated information. When an alert is to be overridden in the system, the physician has to choose one of the following two options: 1) provide the reason for the alert override or 2) cancel and/or change the prescription.	NR	(Korea) Official governmental rules revised by the Ministry of Food and Drug Safety were used in the study hospital	Part of EHR	14,780,519 prescriptions	DDI alerts and if the reasons for alert overrides differ by department (ED and GW)	Prevalence of DDI alerts and alert overrides rate	51,864 (0.35%)	32,231 (67,9%)	No	DDI alerts and the reasons for alert overrides differed by admitting department. Different strategies for each department and improve the alert rules may prevent inappropriate alerts.	The analyses have important limitations. The study may have selection bias because data from only one institution were used. The study population was derived from a teaching hospital, which may be a quite different clinical setting to that of general hospitals or private clinics. As we excluded the out-patient setting in this study, our results may not reflect the general clinical setting, includ…
ID2	Ahn et al., (2014) b	Korea	Determine whether the incidence of alerts for DDI and their override rates differed by admitting department. Also assessed the comparative risk of alerts for DDI and their override rate by admitting department after adjusting for known risk factors. The prevalenceof DDI alerts and their override rate were also demonstrated.	Retrospective cohort	17 months	Tertiary teaching hospital	Not	This study was supported by a grant of the KoreaHealth Technology Research and Development Project,Ministry of Health and Welfare, Korea (HI13C07230200)and by a National Research Foundation of Korea(NRF) grant funded by the Korean government (MSIP)(2010-0028631).	Yes	Only prescriptions entered by physicians were included in the analyses. A DDI alert event was defined as the occurrence of a new alert regarding a DDI during the observation period.	NR	Official rules for DDI notifications provided by the Ministry of Health andWelfare, Korea, as reviewed and revised by the KoreanFood and Drug Administration.	Part of EHR	102,379 prescriptions	The person-year incidence rate was calculated as the number of alert events divided by the total person-years at risk. The alert-override rate was calculated by the number of alert overrides divided by the total number of alert events for DDI.	incidence of DDI alerts and the override rate	6060 (5.9%)	4409 (72.8%)	No	The risk of alerts and alert-override rates differed by admitting department. The strategies to reduce DDI and alert overrides should consider the admitting department.	The study participants were limited to inpatients of a teaching hospital. Thus, the results do not reflect the general outpatient setting. The incidences of alerts cannot be directly compared with those in other studies because of differences in rules defining contraindicated drug pairs. The results of this study may also have some selection bias because data from only one institution were used.
ID3	Alsaindan et al. (2022)	Kingdom of Saudi Arabia	To evaluate utilisation of CPOE and CDSS in King Saud University Medical City (KSUMC) hospitals and to develop generalisable recommendations for improved medication-related alert designs and alert handling practises.	cross-sectional, retrospective, observational study	30 months	King Saud University Medical City (KSUMC) hospitals	Not	This study was supported by the National Institute for Health Research Imperial Translational Research Centre (NIHR Imperial PSTRC) and afliated with the NIHR Health Protection Research Unit in Healthcare Associated Infections and Antimicrobial Resistance.	Yes	All alerts were set up as ‘soft-stops’, providing information to the clinician, rather than as ‘hard-stops’ that prevent the clinician from proceeding. When an alert appears, the ordering physician therefore had the option of cancelling the prescribed medication, modifying it, or overriding the alert without making any changes. If the alert was overridden, the physician was required to select a r…	Private (Cerner® Millennium Version 2014)	The rules were partly based on the standard knowledge base provided as part of the CPOE system, and partly tailored by clinical pharmacists to be in concordance with local practice.	Part of EHR	5,114,310 medications were ordered	Number of drug related alerts (DDI included) and alert override. In addition, the replacement ratio was also evaluated.	Prevalence of drug related alert override (only the pDDI alert was extracted from the study)	318,809 (6,2%)	310,096 (97,3%)	Yes (Supplementary information)	In this study, the alert generation rate and override rate were considerably high for all alert types. Discovery of such high alert override rates, and poor documentation of reasons for overriding the alerts have been important for consideration to develop recommendations to improve medication related generation and alert handling with potential to improve clinical practice.	This study had several limitations. The frst is representativeness or generalisability, as it was conducted in one medical city using one CPOE system, and the 307 randomly selected alerts assessed for appropriateness may not be generalisable to the whole population. The second is that as the main source of patient-related information for assessment of appropriateness of alert display and override…
ID4	Amkreutz et al., (2017)	Germany	To study prevalence and nature of potential DDIs (pDDIs) in kidney transplant patients.	Retrospective observational study	7 days	University Hospital RWTH Aachen, Internal medicine ICU.	Not	None	Yes	(Clinical Physician Order Entry (CPOE) system with integrated CDSS from Germany) and mediQ (CDSS from Switzer-land)	Private (Meona and mediQ)	DDI rules from commercial software	CDSSs manually	37,577 prescriptions	Used 100 patient days as denominator because resulting numbers are more convenient to interpret.	Prevalences of pDDIs	MediQ: 21,261 (56,5%) Meona: 7,681 (20,4%)	Not evaluated	No	A high prevalence of pDDIs was detected by MediQ and Meona software. Medications should regularly be checked for pDDIs.	NR
ID5	Bhakta et al., (2019)	USA	To develop a systematic strategy for medication-related CDS alerts and measure the impact of targeted interventions to decrease the total number of alerts and increase alert responsiveness.	Prospective quasi-experimental study	19 months (between June 2016 and January 2018)/ The study period included 29 weeks preintervention and 52 weeks postintervention.	An academic, quaternary care institution in Texas	Not	NR	Yes	The institution adopted an electronic medical record system (Epic Systems, Verona, WI) in May 2016 that involved CPOE integrated with medication-related CDS and commercial knowledge base information to support the alerting structure.	Private (Epic Systems, Verona, WI)	Epic Systems, Verona, WI	Part of EHR	NR (only the number of alerts were reported)	Data on alert and warning frequencies, severity, and response type were analyzed before and after committee interventions to determine the impact of the systematic approach.	Weekly incidence of DDI alert and prescription modifications or acknowledgement before and after CDSS adjustment	Before: 30,600 After: 13,200	Before: 27,111 (88,5%) After: 11,787 (89,3%)	Yes	A committee-led systematic approach to optimizing drug–drug interactions facilitated a significant decrease in the overall number of alerts and an increase in both medication alert acknowledgement and modification rates.	Several limitations: a large, university-affiliated medical center with a strong systems leadership group; they were able to make changes to the entire system using our multidisciplinary group. They had dedicated IT support to assist with changes and capture data for evaluation, but this may not be possible at all health systems. Also, the clinical significance of suppressing certain alerts along…
ID6	Bryant, Fletcher and Payne (2014)	USA	Measure alert override rates on inpatient medication orders entered by physicians using a commercial electronic medical record and clinical decision support system. Also examined whether the type of alert, physician experience level, or specific hospital site affected override rates.	Retrospective	4 days	Two primary teaching hospitals.	Not	NR	Yes	Only major interactions generate interruptive alerts to the physician during order entry and are recorded within the EHR for later review.	Private (Cerner Millennium)	Cerner’s Multum knowledge base.	Part of EHR	18,354 medication orders entered by physicians.	Measure override rates of inpatient medication alerts within a commercial clinical decision support system.	Percentage and association between physicians alerts quantity and their override rate.	1,153 alerts (6,28%)	1,097 (95%)	No	Despite intensive efforts to improve a commercial drug interaction alert system and to reduce alerting, override rates remain as high as reported over a decade ago. Alert fatigue does not seem to contribute. The results suggest the need to fundamentally question the premises of drug interaction alert systems.	Did not assess alert or override appropriateness, review adverse events, or examine behavior outside of the alert window, and could not determine whether alert fatigue or other factors increased the fraction of inappropriate overrides. Some physicians may override alerts, but later cancel their orders, leading to falsely high estimates of noncompliance with the alert recommendation.
ID7	Edrees, H. et al,. (2020)	USA	To determine frequency and appropriateness of overrides of high-priority drug-drug interaction (DDI) alerts and whether adverse drug events (ADEs) were associated with overrides in a newly implemented electronic health record.	Retrospective	1 year	An academic health center in the USA.	Not	NR	Yes	Alerts for highest-severity DDI (however not interruptive)	Private	The medication database used as the core for the rule set was First Databank (First Databank, South San Francisco, CA).	Part of EHR	Unclear	Prevalence of DDI alerts overrides	Percentage and a chi-square test was used to compare ADE rate by override appropriateness.	16,011 alerts	15,318 (95,7%)	Yes (Table of DDI observed)	The override rate was nearly 90% for even the highest-severity DDI alerts, indicating that stronger suggestions should be made for these alerts, while other alerts should be evaluated for potential suppression.	The study was conducted at a single center; generalizability. The list of DDIs included was based on previous studies and expert opinion, but other institutions may categorize the severity of these DDIs differently. The potential for missing data in the retrospective chart review limiting the ability to completely assess appropriateness and detect all ADEs.
ID8	Fritz, D. et al,. (2012)	Switzerland	To evaluate the potential contribution of CDSS to patient management in clinical practice.	Prospective naturalistic analysis	NR	Two general internal medicine wards of a tertiary care university hospital: University Hospital Zurich	Not	No financial support	Yes	Visual alert when a DDI is decected	Private	(PharmaVistab, DrugReax, TheraOpt)	Part of EHR	Unclear	The performance in detect DDI's among three diferent CDSS.	Sensitivity percentage for DDI detection	Pharmavista/53, DrugReax/362 and TheraOpt/328	Pharmavista: 50 (94.3%) DrugReax: 345 (95.3%) TheraOpt: 315 (96%)	Yes	In order to avoid overalerting CDSS should use patient-specific information and management-oriented classifications. Comprehensive information should be displayed on-demand, whereas a limited number of computer-triggered alerts that have management implications in the majority of affected patients should be based on locally customized and supported algorithms.	In the absence of a gold standard for the clinical relevance of potential medication errors, it is possible that the study excluded some relevant alerts, oversaw additional medication errors or, on the other hand, forwarded some irrelevant alerts.
ID9	Knight, A. M. et al,. (2019)	USA	To determine the effects of reducing the number of drug-drug interaction (DDI) alerts in an order entry system.	Retrospective pre–post analysis	5 months before and after threshold	In the Johns Hopkins Bayview Medical Center and Johns Hopkins Hospital	NR	NR	Yes	When a a drug prescription is entered, using a CPOE system, the system provides real-time alerts to the physicians, presented as a pop-up window on the computer screen.	Private EMR; Meditech Corpora- tion, Westwood, Massachusetts, United States	First DataBank	Part of EHR	Before: 241,915 After: 245,757	the percentage of medication orders generating alerts after the intervention	Event numbers and percentage (%)	Before: 19,217 (47,9%) After: 4,461 (14,8%)	Before: 18,819 (97,9%) After: 4286 (96%)	No	Decreasing alert burden and increasing the significance of DDI alerts presented to providers resulted in a statistically significant increase in the acceptance rate for medication alerts overall, and for DDIs in particular.	Unable to distinguish “intermediate” and “severe” DDI and the DDI alert thresholdswere defined by a proprietary commercial algorithm and we did not consider their validity.
ID10	Muylle, Katoo M. et al., (2021)	Belgium	Optimization strategies in a clinical decision support system (CDSS) for drug-drug interaction (DDI)	Retrospective	S1: 7 months S2: 7 months	The pre-post study was conducted in a 721-bed university hospital in Brussels, Belgium.	Not	The funding bodies had no role in the study design	Yes (IBM SPSS Statistics)	Alert acceptance is generally defined as a change to a prescription based on advice provided by the CDSS	Private: system Primuz is a home-grown system with integrated CPOE and CDSS	DelphiCare®	Part of EHR	NR (only the number of alerts were reported)	The alert burden and alert acceptance were analyzed in detail through frequency tables and contingency tables.	Event numbers and percentage (%)	Before: 1,087 After: 2,630	Before: 1,018 After: 1,959	Yes	The implementation of several CDSS optimization strategies was successful.	Evaluating the effect of several system optimization strategies simultaneously could be seen as a limitation
ID11	Nasuhara et al., 2015	Japan	To explore the behavior of physicians only in regard to orders requiring password overrides for the coadministration of contraindicated drug pairs.	Retrospective observational	1 year	National university hospital with 936 beds, about 3000 outpatients/day, about 550 doctors, and an average of 37.500 pre-scriptions/mont.	Not	NR	Yes	DDI control with alerts based on passwords periodically generated and only available by contact with the hospital pharmacist	Governamental (Internal system of a national system hospital)	Developed by the institution’s pharmacy department	Part of EHR	268.622	Prevalence of DDI alerts and alert with password overrides	Percentage on the number of events	170 (0,06%)	111 (65,3%)	Yes	Both patient safety and physicians’ workloads should be taken into consideration in future designs of computerized drug-drug interaction alert systems.	A computerized DIAS with password overrides is useful for promoting medication safety. However, the password override system may represent an excessive burden for physicians and thereby increase alert fatigue.
ID12	Polidori et al., (2012)	Italy	To analyse drug prescriptions in main hospital units, in order to measure the incidence and severity of p-DDIs. In addition, the utility of CDSS and CPOE in terms of alerts adherence was assessed.	Retrospective observational	6 months	Study was carried out at ISMETT, a 90-bed transplant hospital in Palermo, Italy.	Not	NR	Yes	It is possible to verify adherence to p-DDI alerts through the elec-tronic medical record which carries the electronic signature of the physician (statement read yes/no) indicating his or her acknow-ledgement of the interactions.	Private	Micromedex	NR	51.393	There was a relative decrease in the percentage of alerts orders generating after the intervention	Percentage on the number of events	Total: 21,447 (41,7%) Before (monthly): ICU= 47%, CSU= 41%, ASU= 45%, SDU 39%, Dialysis= 43%, Endoscopy= 24%, PACU= 27%; After (Monthly): ICU= 50%, CSU= 42%, ASU= 42%, SDU 38%, Dialysis= 42%, Endoscopy= 22%, PACU= 32%;	Adherence before: ICU=70%, CSU= 41%, ASU= 43%, SDU= 36%, Dialysis= 29%, Endoscopy= 10%, PACU= 42.0%; Adherence after: ICU= 95%, CSU= 95%, ASU= 95%, SDU= 94%, Dialysis= 96%, Endoscopy= 61%, PACU= 90%;	No	Although a slight decrease in the incidence of p-DDIs was observed, development of the ‘acknowledgement function’ has increased physician adherence to alerts.	Checking drug interactions can generatelarge numbers of clinically insignificant alerts (lowseverity) that clinicians might ignore. The strength of the alerts should be related to the severity and importance of the interactions, only in this way ‘alert fatigue’ maydecrease.
ID13	Straichman, Y. Z. et al (2017)	Israel	To compare acceptance rates of alerts generated by the SafeRx® prescription CDSS among different alert types and departments in a tertiary care hospital, identify factors associated with alert acceptance, and determine whether alert overrides were justified.	Retrospective (S1) Prospective (S2)	S1: 1 year S2: 45 days	A tertiary care hospital: Sheba Medical Center	Not	NR	Yes	During the prescription, the alert window is displayed, where the doctor can cancel or change the prescription.	Private -SafeRx (Clinicode Healthcare IT Solutions Ltd., Tel Aviv, Israel) is a comercial clinical decision support system	Lexi-Comp, Micromedex, Truven	Part of EHR	S1: 390,841 S2: 9,894	Number of events	Percent of silenced or overrided alerts	S1: 145,103 (37%) S2: 3,064 (30,9%)	S1: 137,415 (94,7%) S2: 2,934 (95,8%)	No	The vast majority of SafeRx® alerts are overridden, and overriding is justified in most cases. Minimizing the number of alerts is essential to reduce the likelihood of developing “alert fatigue”.	The prospective (S1) study was conducted in internal medicine departments, and the findings regarding the justification of alert overriding may not be applicable to other departments. During the prospective study, prescribers were aware of the study protocol, and the awareness of being monitored may have affected their responses to alerts (Hawthorne effect).
ID14	Tukukino et al. (2022)	Sweden	This study aimed to shed light on interaction alerts in older patients, and the extent to which these require further action or are already being adequately addressed by the patient’s physician.	cross-sectional, retrospective, observational study	30 months	two Swedish primary care centres	Not	Open access funding provided by University of Gothenburg. This study was funded by grants from the Swedish Research Council (521–2013-2639) and the Swedish state under the ALF agreement between the Swedish government and the county councils (ALFGBG-716941).	Yes	alerts are automatically presented in the prescribing module of the electronic health record system, as buttons highlighted in white, yellow and red, respectively. Therefore, the prescribing physicians were exposed to, and had the chance to react to the alerts.	NR	Swedish national interaction database Janusmed	NR	NR	Number of alerts generated and alert override rates	Prevalence of alert override	405	370 (81%)	No	This study shows that, using a computerised decision support system for drug interactions, alerts can be expected to be presented in more than every other older patient with two or more drugs in their medication list. Most of the alerts were already being addressed in health care, for instance by the monitoring of clinical or laboratory parameters, or were not relevant in the clinical setting. In…	It may be regarded as a limitation that the assessors were restricted to the information available in the primary care medical records; although this included hospital discharge summaries [15], all relevant information may not have been available. Therefore, there may be undocumented reasons for the prescribing physician not to act on the unaddressed alerts. Another limitation is that Janusmed, i…
ID15	Velez-Diaz-Pallares, M. et al (2013)	Spain	To analyse the impact of the computerised prescription order entry (CPOE) alerts on the reduction of errors due to medication interactions in the prescribing process of vitamin K antagonists.	Prospective study	3 months	University tertiary care centre.	Not	NR	Yes	An alert was displayed, informing the clinician of the risks of the concomitant prescriptions	Private (Farmatools, Dominion Healthcare).	Private (Farmatools, Dominion Healthcare).	Isolated	NR	Number of medications errors	Percentage	High doses: 22%; Drug interaction: 22 %; High doses: 10%; High doses in renal and/or hepatic patientes: 15 %; Insuficient monitorization: 14% and others: 17%.	NR	No	Implementation of a CPOE interaction alert programme reduces interaction errors. Additionally, the use of this new technology allowed us to perform a thorough analysis of data and to identify and implement actions aimed at improving patient safety.	One limitation of this study was that the inclusion criteria may not have included patients with INRs below 4, yet above the therapeutic range for their specific pathology. Another limitation of the before–after studies is that the populations are separated in time and lack a control group.
ID16	Zenziper et al., (2014)	Israel	To describe the implementation and customization of a drug prescription CDSS in a large tertiary care hospital.	Prospective observational	6 months	Sheba Medical Center. For a preliminary quantitative analysis of prescription volume and medication alerts by the CDSS, were examined alerts triggered by medical prescription in six internal medicine departments each have 36-43 hospitalization beds, including a 5-bed step-down intensive care unit in most departments.	NR	NR	Yes	When a a drug prescription is entered, using a CPOE system, the system provides real-time alerts to the physicians, presented as a pop-up window on the computer screen.	Private -SafeRx (Clinicode Healthcare IT Solutions Ltd., Tel Aviv, Israel) is a comercial clinical decision support system	Lexi-Comp, Micromedex.	Part of EHR	136.459	Number of events	Percent of silenced or overrided alerts	21,799 (15,9%)	NR	No	To ensure its effectiveness, the implementation of a comercial CDSS in a large hospital requires system customization guided by the specific needs of particular departments, at both the initial and the maintenance stage. this task is best achieved by a multidisciplinary team in colaboration with the end-user. Future research estabilishing guidelines for drug silencing and exploring features that …	NR
* Estimated by reviewers
